# Supplementary material for: The Novel Small-molecule Annexin-A1 Mimetic, Compound 17b, Elicits Vasoprotective Actions in Streptozotocin-induced Diabetic Mice
Source: PubMed Central journal article supplement (PMC7073122; doi:10.3390/ijms21041384), 2020-02-18
Supplement: ijms-21-01384-s001.pdf [file ijms-21-01384-s001.pdf]

**Supplementary Materials:**

# **The Novel Small-molecule Annexin-A1 Mimetic, Compound 17b, Elicits Vasoprotective Actions in Streptozotocin-induced Diabetic Mice**

**Sarah A Marshall**<sup>1,†</sup>, **Cheng Xue Qin**<sup>2,3,4,†,\*</sup>, **Maria Jelinic**<sup>5</sup>, **Kelly O'Sullivan**<sup>6</sup>, **Minh Deo**<sup>2</sup>, **Jesse Walsh**<sup>2</sup>, **Mandy Li**<sup>2</sup>, **Laura J Parry**<sup>6</sup>, **Rebecca H. Ritchie**<sup>2,3,4,†</sup> and **Chen Huei Leo**<sup>6,7,†,\*</sup>

<sup>1</sup> The Ritchie Centre, Department of Obstetrics and Gynaecology, School of Clinical Sciences, Monash University, Clayton, Victoria 3168 Australia; sarah.marshall@monash.edu

<sup>2</sup> Heart Failure Pharmacology, Baker Heart & Diabetes Institute, Victoria 3004, Australia; Minh.Deo@baker.edu.au (M.D.); jesselorenwalsh15@gmail.com (J.W.); Mandy.Li@baker.edu.au (M.L.); Rebecca.Ritchie@monash.edu (R.H.R.)

<sup>3</sup> Department of Pharmacology, University of Melbourne, Victoria 3010, Australia

<sup>4</sup> Drug Discovery Biology, Monash Institute of Pharmaceutical Sciences, Monash University, Victoria 3052, Australia

<sup>5</sup> Department of Physiology, Anatomy & Microbiology, La Trobe University, Bundoora, Victoria 3086, Australia; M.Jelinic@latrobe.edu.au

<sup>6</sup> School of BioSciences, The University of Melbourne, Victoria 3010, Australia; kelly.osullivan@monash.edu (K.O.S.); laura.parry@adelaide.edu.au (L.J.P.)

<sup>7</sup> Science and Math Cluster, Singapore University of Technology & Design, Singapore 487372, Singapore

\* Correspondence: chenhuei\_leo@sutd.edu.sg (C.H.L.); ChengxueHelena.Qin@baker.edu.au (C.X.Q.)

† These authors contributed equally to this work.

‡ Joint senior authors.

Supplementary Figure

**A**

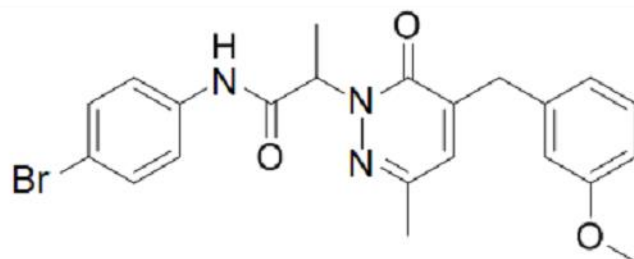

**Compound 17b (Cmpd17b)**

**B**

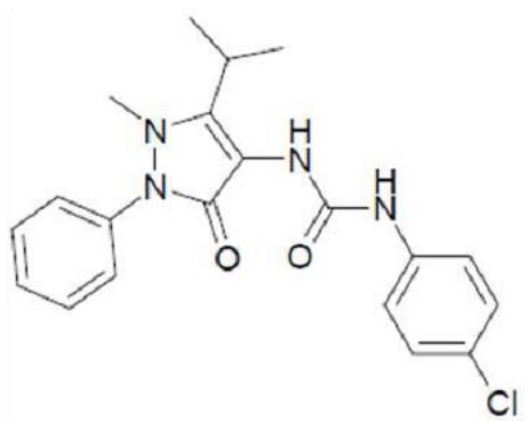

**Compound 43 (Cmpd43)**

**Supplementary Figure S1:** Crystalline structure of (A) Cmpd17b and (B) Cmpd43.

**Supplementary Table S1:** Primer sequences for the quantitative amplification of murine genes using SYBR green.

| Gene         | Accession Number | Oligo Type | Primer Sequence 5'–3'   | Amplicon Length |
|--------------|------------------|------------|-------------------------|-----------------|
| <i>Rn18S</i> | NR_003278        | Forward    | TG TTCACCATGAGGCTGAGATC | 67 bp           |
|              |                  | Reverse    | TGGTTGCCTGGGAAAATCC     |                 |
| <i>Fpr1</i>  | NM_013521        | Forward    | CCTTGGCTTTCTTCAACAGC    | 247 bp          |
|              |                  | Reverse    | GCACAGTGGA ACTCAAAGCA   |                 |
| <i>Fpr2</i>  | NM_008039        | Forward    | ACAGCAGTTGTGGCTTCCTT    | 192 bp          |
|              |                  | Reverse    | CCTGGCCCATGAAAACATAG    |                 |
| <i>Fpr3</i>  | NM_008042        | Forward    | GGGCAACTCTGTTGAGGAAA    | 201 bp          |
|              |                  | Reverse    | GAAGGAAGCCACA ACTCCTG   |                 |

**Supplementary Table S2:** Primer and probe sequences for the quantitative amplification of murine genes using TaqMan.

| Gene         | Accession Number | Oligo Type | Primer Sequence 5'–3'      | Amplicon Length |
|--------------|------------------|------------|----------------------------|-----------------|
| <i>18S</i>   | NR_003278        | Forward    | GCATGGCCGTTCTTAGTTGG       | 67 bp           |
|              |                  | Reverse    | TGCCAGAGTCTCGTTCGTTA       |                 |
|              |                  | Probe      | TGGAGCGATTTGTCTGGTTATTCCGA |                 |
| <i>Fpr1</i>  | NM_013521        | Forward    | TCTTCCTGATTGCCCTCATT       | 121 bp          |
|              |                  | Reverse    | GCACAAATCCAGGGTACGAT       |                 |
|              |                  | Probe      | GTGAGCCTAGCCAAGAAGGTAA     |                 |
| <i>Fpr2</i>  | NM_008039        | Forward    | TGATTGCTCTCATTGCCTTG       | 62 bp           |
|              |                  | Reverse    | GTTCTGAGCCCAGACTGGAT       |                 |
|              |                  | Probe      | GACCGCTGCATTTGTGTTCT       |                 |
| <i>Ptgs1</i> | NM_008969        | Forward    | TCGGTCCTGCTCGCAGAT         | 95 bp           |
|              |                  | Reverse    | AGGCCAAAGCGGACACAGA        |                 |
|              |                  | Probe      | CACCAGTCAATCCCTGTTGTTA     |                 |
| <i>Ptgs2</i> | NM_011198        | Forward    | TCCTCCCGTAGCAGATGAC        | 158 bp          |
|              |                  | Reverse    | TGCTGGGCAAAGAATGCAAAC      |                 |
|              |                  | Probe      | GGGAAATAAGGAGCTTCCTGAT     |                 |
| <i>Ptgis</i> | NM_008968        | Forward    | GGGGCAGATACGTCACTGTT       | 78 bp           |

---

|                              |              |         |                              |        |
|------------------------------|--------------|---------|------------------------------|--------|
|                              |              | Reverse | GAAGATGGCATAGGGATGGA         |        |
|                              |              | Probe   | TTACGACACAGTGGTGTGGG         |        |
| <i>Ptgir</i>                 | NM_008967    | Forward | GCTCGTTTGTACCGACCTCT         | 121 bp |
|                              |              | Reverse | TGAGTGAAGCCTCGGATCAT         |        |
|                              |              | Probe   | GGCACGAGAGGATGAAGTTT         |        |
| <i>Tnf</i>                   | NM_001278601 | Forward | GGCTGCCCCGACTACGT            | 66 bp  |
|                              |              | Reverse | TTTCTCCTGGTATGAGATAGCAAATC   |        |
|                              |              | Probe   | TCACCCACACCGTCAG             |        |
| <i>Mcp-1 (Ccp1)</i>          | NM_011333    | Forward | GTCTGTGCTGACCCCAAGAAG        | 62 bp  |
|                              |              | Reverse | TGGTTCCGATCCAGGTTTTTA        |        |
|                              |              | Probe   | AATGGGTCCAGACATAC            |        |
| <i>Icam-1</i>                | NM_010493    | Forward | GGAGGTGGCGGGAAAGTT           | 72 bp  |
|                              |              | Reverse | TCCAGCCGAGGACCATACAG         |        |
|                              |              | Probe   | CTGAAAGCTCTCCACCTC           |        |
| <i>IL1<math>\beta</math></i> | NM_008361    | Forward | TCGTGCTGTCGGACCCATA          | 93 bp  |
|                              |              | Reverse | CTTGTACAAAGCTCATGGAGAATATCAC |        |
|                              |              | Probe   | CTGAAAGCTCTCCACCTC           |        |

---

**Supplementary Table S3:** Vascular reactivity of small molecule FPR agonists, Cmpd17 and Cmpd43 in the mouse. Values are expressed as mean  $\pm$  S.E.M; *n*, aorta from individual mice. ACh, acetylcholine; Cmpd17b, compound 17b; Cmpd43, compound 43; DMSO, placebo control;  $E_{max}$ , maximum constriction relative to %U46619;  $pEC_{50}$ , sensitivity;  $R_{max}$ , maximum relaxation (negative values represent the reversal of relaxation). ND = not determined. \*Significantly different from DMSO control (by one-way ANOVA, Tukeys *post hoc* test).

|                            | DMSO     |                 |             | Cmpd17b  |                  |             | Cmpd43   |                 |             |
|----------------------------|----------|-----------------|-------------|----------|------------------|-------------|----------|-----------------|-------------|
|                            | <i>n</i> | $pEC_{50}$      | $R_{max}$   | <i>n</i> | $pEC_{50}$       | $R_{max}$   | <i>n</i> | $pEC_{50}$      | $R_{max}$   |
| <i>Direct vasodilation</i> | 5        | ND              | -6 $\pm$ 7  | 5        | 5.09 $\pm$ 0.03  | 62 $\pm$ 5* | 5        | ND              | -2 $\pm$ 9  |
| <i>(FPR agonists)</i>      |          |                 |             |          |                  |             |          |                 |             |
| <i>ACh</i>                 | 5        | 6.82 $\pm$ 0.15 | 93 $\pm$ 2  | 5        | 6.95 $\pm$ 0.19  | 96 $\pm$ 1  | 5        | 7.04 $\pm$ 0.09 | 93 $\pm$ 3  |
|                            | <i>n</i> | $pEC_{50}$      | $E_{max}$   | <i>n</i> | $pEC_{50}$       | $E_{max}$   | <i>n</i> | $pEC_{50}$      | $E_{max}$   |
| <i>U46619</i>              | 5        | 7.65 $\pm$ 0.06 | 112 $\pm$ 1 | 5        | 7.22 $\pm$ 0.06* | 96 $\pm$ 4* | 5        | 7.51 $\pm$ 0.11 | 108 $\pm$ 3 |
